# Supplementary material for: Lymphoid Hyperplasia and Lymphoma in Transgenic Mice Expressing the Small Non-Coding RNA, EBER1 of Epstein-Barr Virus
Source: PubMed Central journal article supplement (PMC2817001; doi:10.1371/journal.pone.0009092), 2010-02-08
Supplement: pone.0009092.s006.pdf [file pone.0009092.s006.pdf]

**Supplementary materials****Table S2: Oligonucleotide sequences used for PCR.**

| Primer name | 5' to 3' primer sequence       |
|-------------|--------------------------------|
| CR1         | gtgtgtgtgaattcgtcagcctgcaaggtg |
| CR2         | gtgtgtgtgaattcactatagcaaaccg   |
| CR3         | gtgtgtgtgaattctcttgaggagatgtag |
| CR4         | gtgtgtgtctcgagaaaacatgcggaccac |
| CR8         | aggacctacgctgc                 |
| CR9         | tacttgaccgaagac                |
| CR25        | gtagacactgcaaaacctc            |
| GAPDH F     | tccaccaccctggtgctgta           |
| GAPDH R     | accacagtccatgccatcac           |
| c-mycF      | cagctggcgtaatagcgaagag         |
| c-mycR      | ctgtgactggtgagtactcaacc        |
