# Supplementary material for: Lymphoid Hyperplasia and Lymphoma in Transgenic Mice Expressing the Small Non-Coding RNA, EBER1 of Epstein-Barr Virus
Source: PubMed Central journal article supplement (PMC2817001; doi:10.1371/journal.pone.0009092), 2010-02-08
Supplement: pone.0009092.s007.pdf [file pone.0009092.s007.pdf]

**Table 3: Oligonucleotide sequences used for EMSA.**

| Primer name | 5' to 3' primer sequence                  |
|-------------|-------------------------------------------|
| EMSAMycF    | gagcgggaagcagacc <b>cacgtg</b> gtctgcttcc |
| EMSAMycR    | gtagggaagcagaccacgtggtctgcttcc            |

The E-box Myc binding consensus motif is shown in bold in the forward primer.
